# Supplementary material
Source: MDPI journal article supplement (https://www.mdpi.com/2071-1050/15/17/12966)
Supplement: s1 [file s1 › sustainability-2390855-supplementary.pdf]

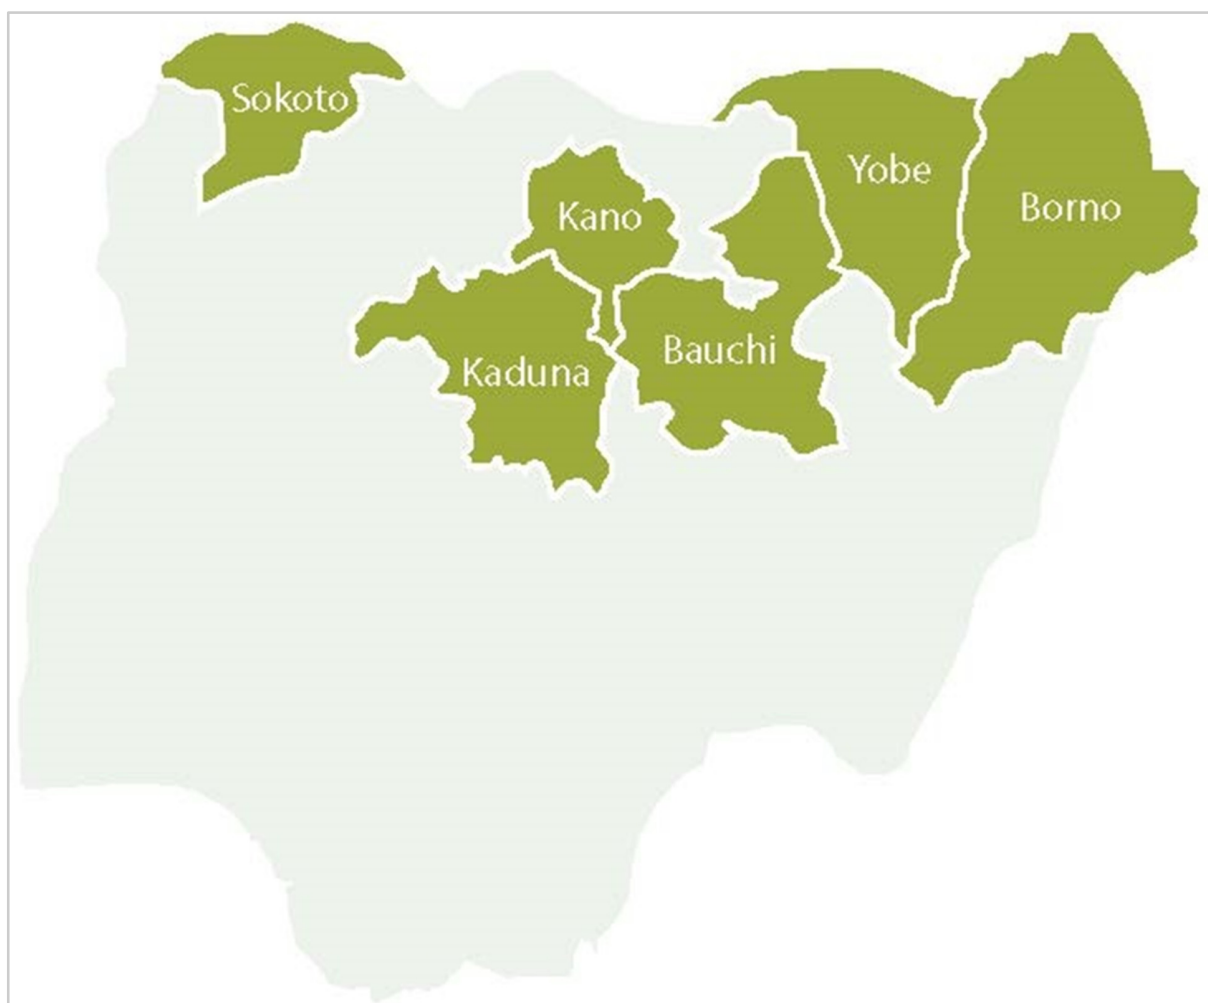

**Figure S1:** The six (6) Northern states SCIDaR provides RI strengthening support [43]

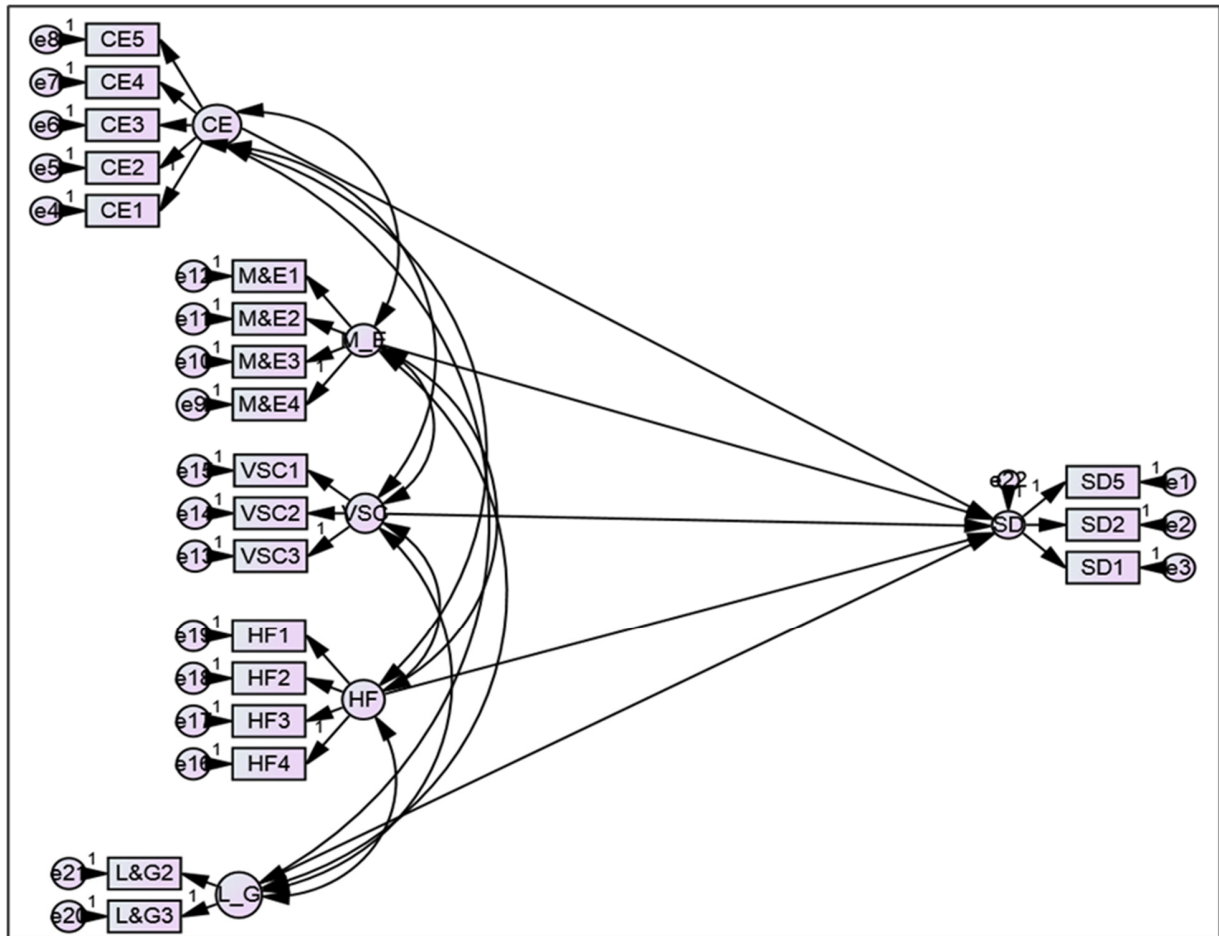

**Figure S2:** The study model/framework using SEM designed path analysis [Hypothesis  $H_{2.1}$  -  $H_{6.1}$ ]

**Table S1:** Questionnaire guide for survey

| Level           | Focus                                                                                                                                                                                                                                                                                                                                                                                                                                                                    | Participants                                                                           | Interview method |
|-----------------|--------------------------------------------------------------------------------------------------------------------------------------------------------------------------------------------------------------------------------------------------------------------------------------------------------------------------------------------------------------------------------------------------------------------------------------------------------------------------|----------------------------------------------------------------------------------------|------------------|
| State           | <ul style="list-style-type: none"> <li>• The perceived effect of COVID-19 on SPHCMB operations and its routine activities</li> <li>• Impact of the pandemic on the availability of resources and personnel to implement program activities</li> <li>• The effect on the delivery of essential PHC services across health facilities and LGAs</li> <li>• Possible strategies to encourage personnel to continue program implementation throughout the pandemic</li> </ul> | HCH, ES SPHCMB, Directors, PMs and program officers (2 program officers and directors) | KII              |
| LGA             | <ul style="list-style-type: none"> <li>• The effect of COVID-19 on LGA operations and its routine activities</li> <li>• The effect on the delivery of essential PHC services across health facilities in LGAs</li> <li>• The effect of the pandemic on resource availability for PHC services in the LGA</li> </ul>                                                                                                                                                      | LGHA team (2 respondents per LGA)                                                      | KII              |
| Health facility | <ul style="list-style-type: none"> <li>• The general perspective of community dwellers and health workers on PHC services during the pandemic</li> <li>• Essential needs of the service providers that will enable continuity of service provision</li> </ul>                                                                                                                                                                                                            | Service providers, health facility in-charges (2 service providers per HF)             | KII              |
| Settlements     | <ul style="list-style-type: none"> <li>• The general perspective of community dwellers on health facility visits during the pandemic</li> <li>• Possible strategies to motivate community members to access essential services during the pandemic</li> </ul>                                                                                                                                                                                                            | Traditional leaders, VCMs and caregivers (2 caregivers per settlement/facility)        | KII              |

**Table S2:** Kaiser-Meyer-Olkin and Bartlett's Test

|                                   |                    |          |
|-----------------------------------|--------------------|----------|
| KMO Measure of Sampling Adequacy. |                    | 0.951    |
| Bartlett's Test of Sphericity     | Approx. Chi-Square | 5841.294 |
|                                   | df                 | 276      |
|                                   | Sig.               | <0.001   |

**Table S3:** Initial Eigenvalues and Rotation Sums of Squared Loadings

| Comp | Initial Eigenvalues |               |              | Rotation Sums of Squared Loadings |               |              |
|------|---------------------|---------------|--------------|-----------------------------------|---------------|--------------|
|      | Total               | % of Variance | Cumulative % | Total                             | % of Variance | Cumulative % |
| 1    | 13.551              | 56.462        | 56.462       | 6.794                             | 28.306        | 28.306       |
| 2    | 1.767               | 7.362         | 63.824       | 4.776                             | 19.899        | 48.205       |
| 3    | 1.185               | 4.938         | 68.762       | 3.483                             | 14.513        | 62.718       |
| 4    | 1.053               | 4.388         | 73.150       | 2.504                             | 10.432        | 73.150       |
| 5    | 0.890               | 3.707         | 76.857       |                                   |               |              |
| 6    | 0.634               | 2.641         | 79.498       |                                   |               |              |
| 7    | 0.596               | 2.485         | 81.983       |                                   |               |              |

**Note:** Comp=Component

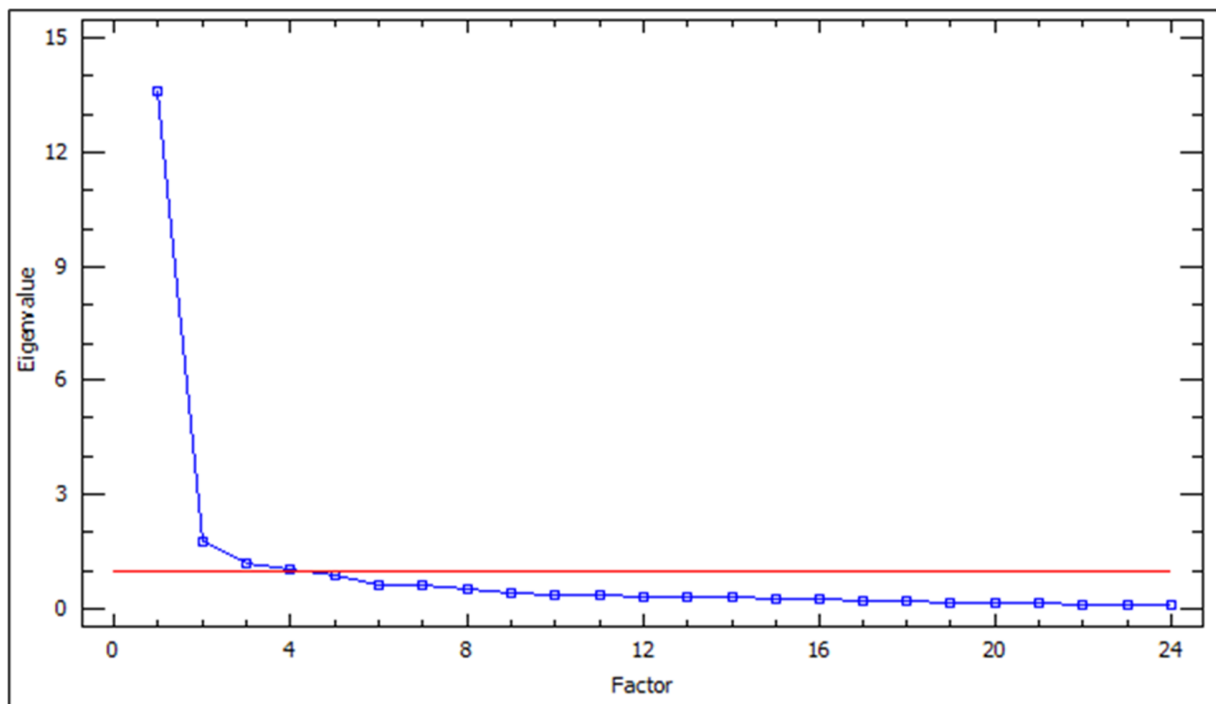

**Figure S3:** Components with factor loadings matrix

**Table S4:** Initial Eigenvalues and Rotation Sums of Squared Loadings

| Indicators      | C1    | Cronbach's $\alpha$ | C2    | Cronbach's $\alpha$ | C3    | Cronbach's $\alpha$ | C4    | Cronbach's $\alpha$ |
|-----------------|-------|---------------------|-------|---------------------|-------|---------------------|-------|---------------------|
| <b>SD1</b>      | 0.537 | 0.728               |       |                     |       |                     |       |                     |
| <b>SD2</b>      | 0.678 |                     |       |                     |       |                     |       |                     |
| <b>SD3</b>      | 0.199 |                     |       |                     |       |                     |       |                     |
| <b>SD4</b>      | 0.495 |                     |       |                     |       |                     |       |                     |
| <b>SD5</b>      | 0.643 |                     |       |                     |       |                     |       |                     |
| <b>CE1</b>      | 0.680 |                     |       |                     |       |                     |       |                     |
| <b>CE2</b>      | 0.692 |                     |       |                     |       |                     |       |                     |
| <b>CE3</b>      | 0.766 |                     |       |                     |       |                     |       |                     |
| <b>CE4</b>      | 0.728 |                     |       |                     |       |                     |       |                     |
| <b>CE5</b>      | 0.767 |                     |       |                     |       |                     |       |                     |
| <b>M&amp;E1</b> | 0.719 |                     |       |                     |       |                     |       |                     |
| <b>M&amp;E2</b> | 0.659 |                     |       |                     |       |                     |       |                     |
| <b>M&amp;E3</b> | 0.691 |                     |       |                     |       |                     |       |                     |
| <b>M&amp;E4</b> | 0.661 |                     |       |                     |       |                     |       |                     |
| <b>VSC1</b>     |       |                     |       |                     | 0.575 | 0.742               |       |                     |
| <b>VSC2</b>     |       |                     |       |                     | 0.543 |                     |       |                     |
| <b>VSC3</b>     |       |                     |       |                     | 0.607 |                     |       |                     |
| <b>HF1</b>      |       |                     | 0.787 | 0.861               |       |                     |       |                     |
| <b>HF2</b>      |       |                     | 0.835 |                     |       |                     |       |                     |
| <b>HF3</b>      |       |                     | 0.860 |                     |       |                     |       |                     |
| <b>HF4</b>      |       |                     | 0.784 |                     |       |                     |       |                     |
| <b>L&amp;G1</b> |       |                     |       |                     |       |                     | 0.487 | 0.892               |
| <b>L&amp;G2</b> |       |                     |       |                     |       |                     | 0.814 |                     |
| <b>L&amp;G3</b> |       |                     |       |                     |       |                     | 0.837 |                     |

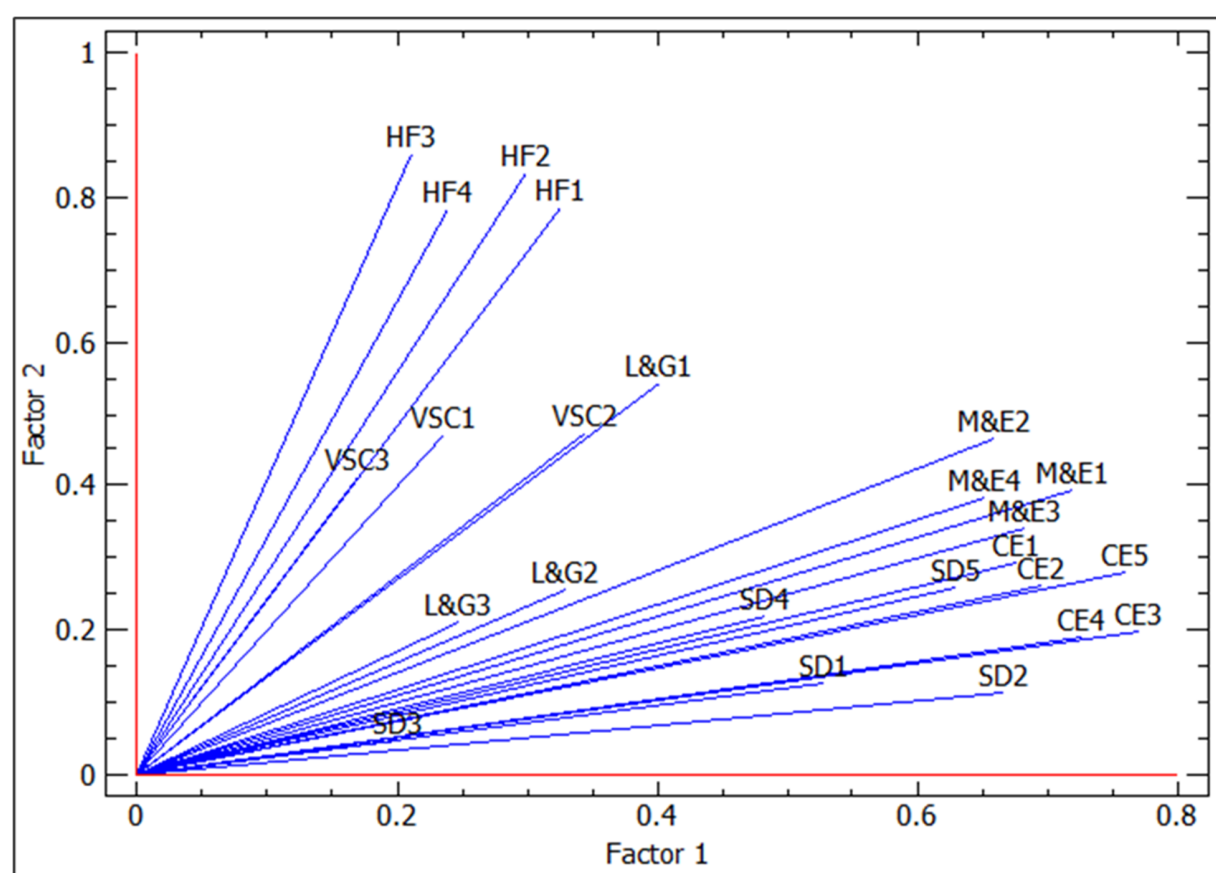

**Figure S4:** Factor loading in components
